# Supplementary material for: Flavonoids Identification and Pancreatic Beta-Cell Protective Effect of Lotus Seedpod
Source: MDPI journal article supplement (doi:10.3390/antiox9080658), 2020-07-24
Supplement: s1 [file s1]

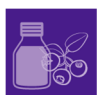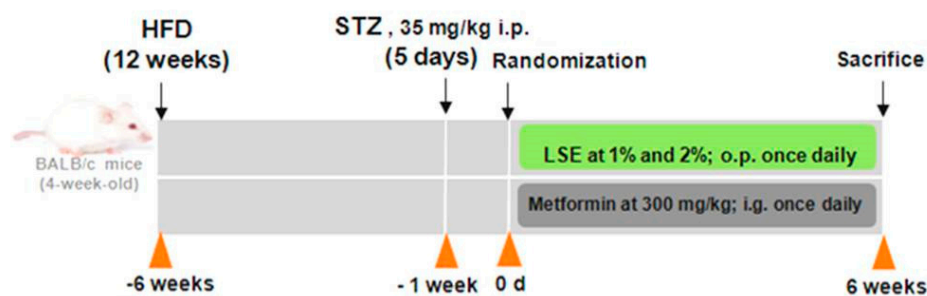

**Figure S1.** Flow chart of HFD combined STZ treatment-induced DM mice treated with LSE (1% and 2%) or metformin (300 mg/kg) for 6 weeks.

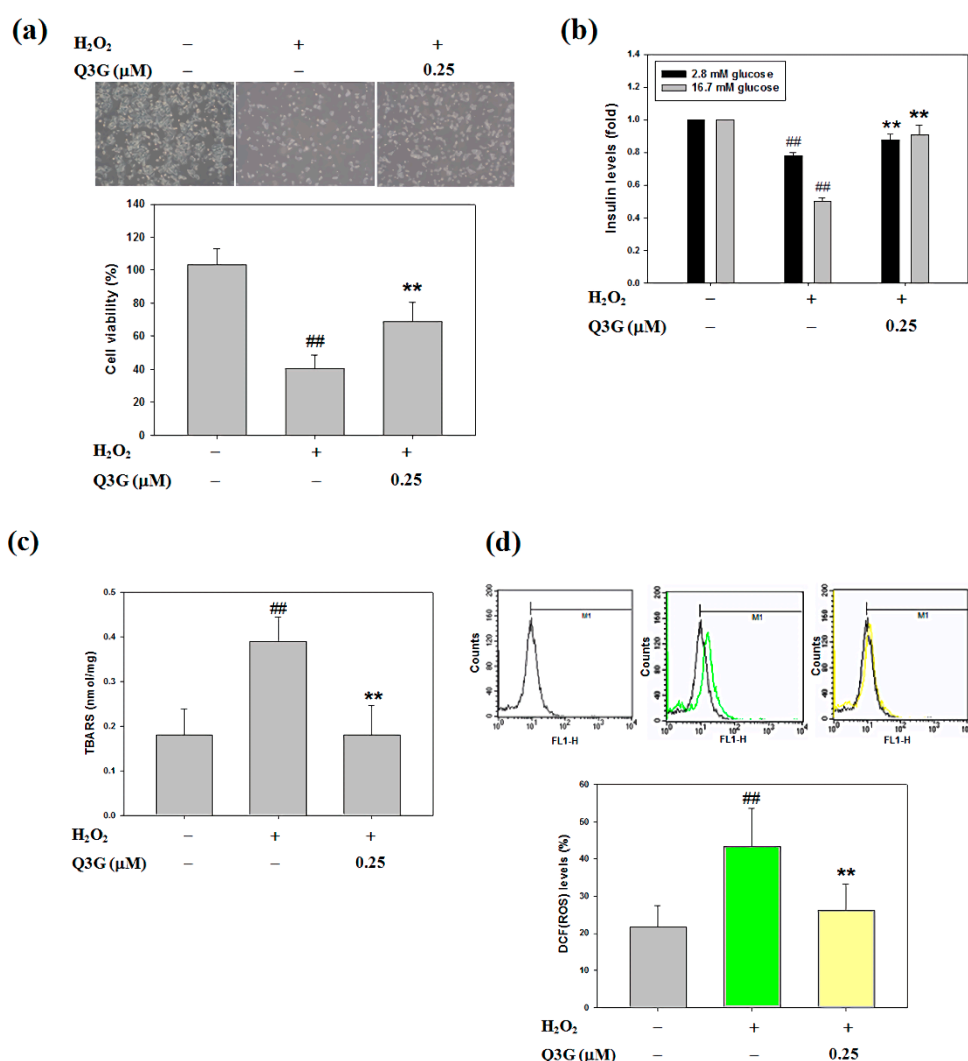

**Figure S2.** Effect of Q3G on H<sub>2</sub>O<sub>2</sub>-induced beta-cell viability loss and oxidative injury. (a) RIN-5F cells were treated with or without Q3G (0.25 μM) in combination with 200 μM of H<sub>2</sub>O<sub>2</sub> for 24 h. Cell viability was assayed by MTT method. (b-d) Under the same co-treatment conditions, the intracellular insulin secretion (b), lipid peroxidation (c), and ROS level (d) were measured by GSIS, TBARS, and H<sub>2</sub>DCF-DA assays, respectively. The results are represented as the mean ± SD (n ≥ 3) from three independent experiments. ##p < 0.01, compared with the untreated control; \*\*p < 0.01, compared with the H<sub>2</sub>O<sub>2</sub> group.

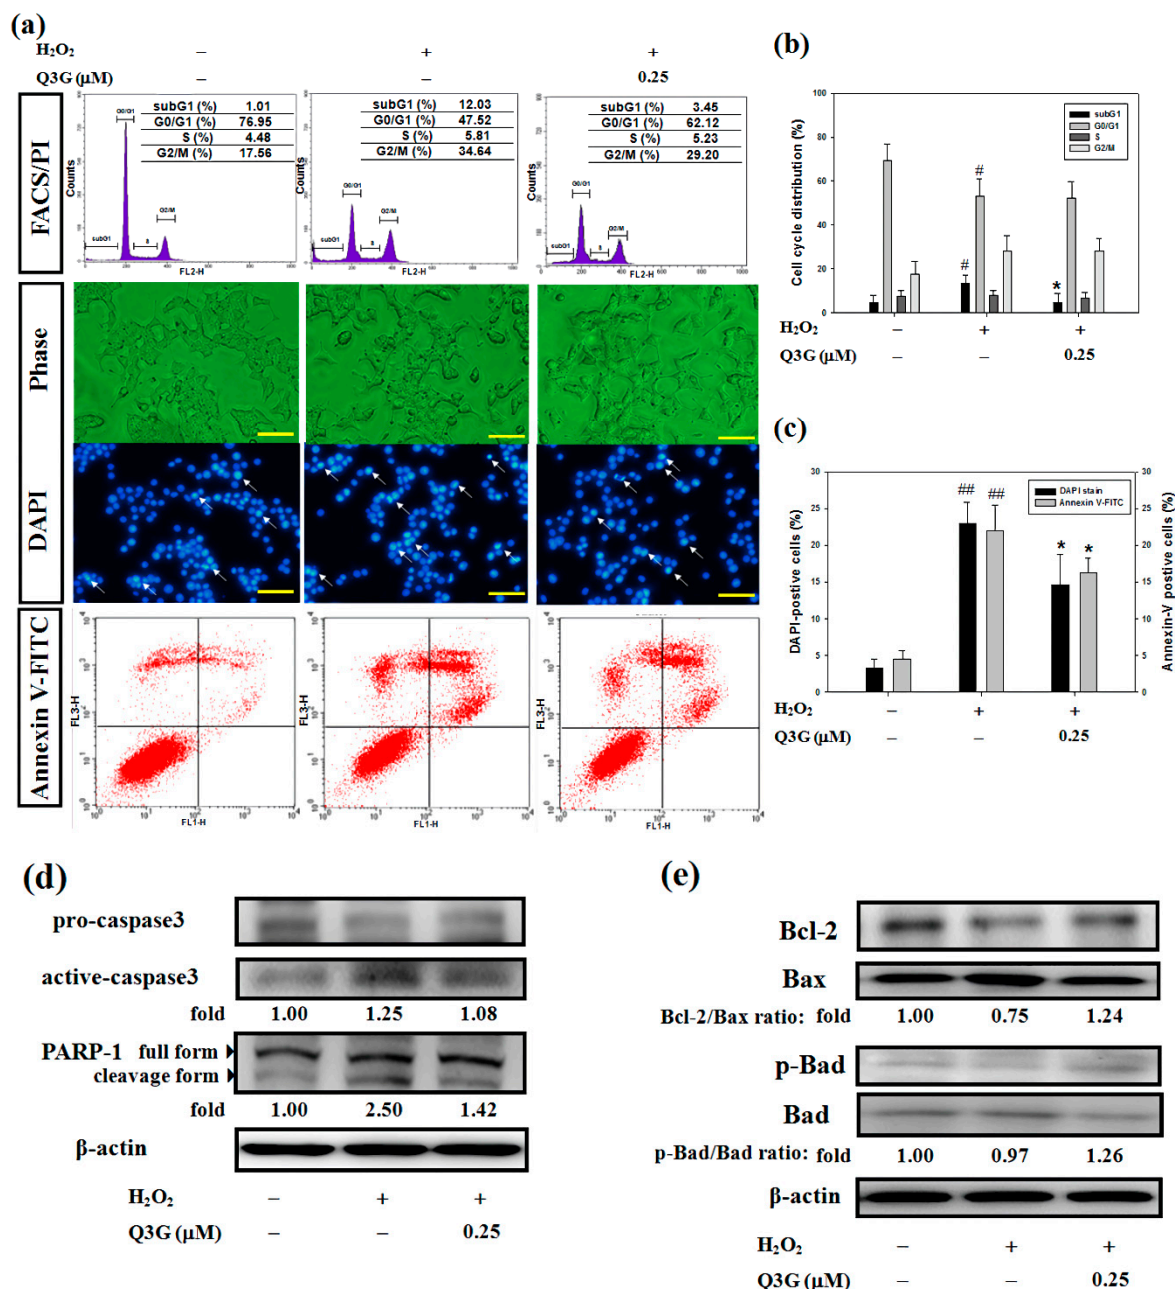

**Figure S3.** Effect of Q3G on H<sub>2</sub>O<sub>2</sub>-induced beta-cell apoptosis. RIN-5F cells were treated with or without Q3G (0.25 μM) in the presence of 200 μM of H<sub>2</sub>O<sub>2</sub> for 24 h. **(a)** The DNA content was assayed by flow cytometry. The position of the subG1 peak, integrated by apoptotic cells, and the peaks of G0/G1, S, and G2/M phases are indicated (*upper panel*). Apoptotic cells were further detected by DAPI method. Arrows indicate apoptotic cells. Panels show phase-contrast microscopy and DAPI staining (*middle panel*). Flow cytometry method of cell membranes with annexin V-FITC staining (*lower panel*), a significant number of apoptotic cells were stained with positive annexin V-FITC (right quadrant). **(b)** Quantitative assessment of the cell percentage in each phase of the cell cycle was indicated by PI and is represented as the mean ± SD (n ≥ 3) from three independent experiments. **(c)** The percentage of DAPI-positive cells (*left axis*) relative to the total cell number in each random field (> 100 cells) and the proportion of annexin V-positive cells (*right axis*) are, respectively, represented as mean ± SD (n ≥ 3) from three independent experiments ± SD. #*p* < 0.05, ##*p* < 0.01, compared with the untreated control; \**p* < 0.05, compared with the H<sub>2</sub>O<sub>2</sub> group. **(d-e)** The protein levels of caspase-3, PARP-1 **(d)**, Bcl-2, Bax, p-Bad, and Bad **(e)** were analyzed by Western blot analysis. β-actin served as an internal control. Determined expressions of the protein were quantified by densitometric analysis with that of control being 1.00 fold, as shown just below the gel data.

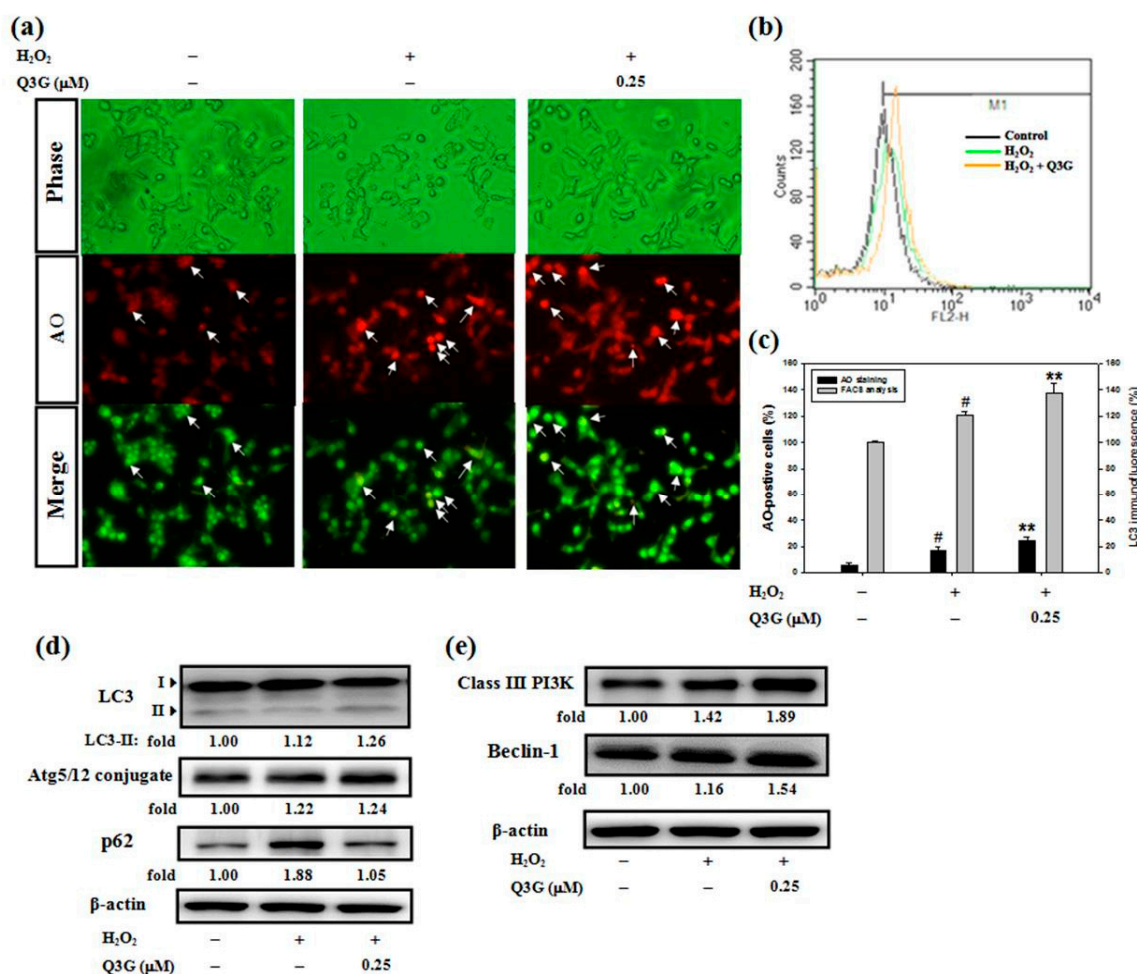

**Figure 4.** Effect of Q3G on H<sub>2</sub>O<sub>2</sub>-induced beta-cell autophagy. RIN-5F cells were treated with or without Q3G (0.25 μM) in the presence of 200 μM of H<sub>2</sub>O<sub>2</sub> for 24 h. **(a)** Autophagy was assayed by the AO method. Arrows indicate autophagic cells. Panels show (from upper to lower) phase-contrast microscopy (upper), AO staining (middle), and merge image (lower). **(b)** The relative level of LC3 immunofluorescence intensity was carried out by flow cytometry. **(c)** The percentage of AO-positive cells relative to the total cell number (left axis) in each random field (> 100 cells) and the immunofluorescence intensity of LC3 (right axis) are, respectively, represented as mean ± SD (n ≥ 3) from three independent experiments. <sup>#</sup>*p* < 0.05, compared with the untreated control; <sup>\*\*</sup>*p* < 0.01, compared with the H<sub>2</sub>O<sub>2</sub> group. **(d-e)** The protein levels of LC3I/II, Atg5/12 conjugate, p62 **(d)**, class III PI3K, and Beclin-1 **(e)** were assayed by Western blot analysis. β-actin served as an internal control. Determined expressions of the protein were quantified by densitometric analysis with that of control being 1.00 fold, as shown just below the gel data.

**Table 1.** Effect of LSE on the serum biochemical parameters of mice induced by an HFD combined with STZ treatment. <sup>a</sup>

| Groups<br>Variable <sup>b</sup> | Control        | HFD/STZ                     | HFD/STZ + 1% LSE            | HFD/STZ + 2% LSE            | HFD/STZ + Metformin         |
|---------------------------------|----------------|-----------------------------|-----------------------------|-----------------------------|-----------------------------|
| TG (mg/dL)                      | 152.67 ± 18.88 | 141.67 ± 20.98              | 106.50 ± 19.36 <sup>e</sup> | 93.50 ± 21.46 <sup>f</sup>  | 103.73 ± 25.22              |
| TC (mg/dL)                      | 165.60 ± 17.44 | 223.75 ± 21.42 <sup>c</sup> | 227.33 ± 8.14               | 182.75 ± 17.06 <sup>e</sup> | 195.27 ± 8.26 <sup>e</sup>  |
| LDL-c (mg/dL)                   | 35.50 ± 6.35   | 67.25 ± 8.81 <sup>c</sup>   | 66.67 ± 12.06               | 59.75 ± 5.91 <sup>e</sup>   | 61.08 ± 10.28               |
| HDL-c (mg/dL)                   | 89.20 ± 5.45   | 125.00 ± 17.36 <sup>c</sup> | 118.00 ± 14.18              | 142.50 ± 8.06               | 115.24 ± 13.25              |
| LDL-c/HDL-c                     | 0.41 ± 0.08    | 0.53 ± 0.02 <sup>d</sup>    | 0.56 ± 0.09                 | 0.42 ± 0.07 <sup>e</sup>    | 0.54 ± 0.06                 |
| AST (U/L)                       | 226.00 ± 56.20 | 250.00 ± 101.08             | 228.33 ± 43.02              | 213.50 ± 33.26              | 202.58 ± 30.61              |
| ALT (U/L)                       | 76.00 ± 9.90   | 99.50 ± 9.88 <sup>d</sup>   | 119.00 ± 36.77              | 82.00 ± 32.49               | 68.34 ± 16.08 <sup>e</sup>  |
| BUN (mg/dL)                     | 21.20 ± 2.52   | 34.04 ± 6.86 <sup>c</sup>   | 14.67 ± 1.39 <sup>f</sup>   | 16.80 ± 2.81 <sup>f</sup>   | 15.68 ± 2.56 <sup>f</sup>   |
| Cre (mg/dL)                     | 0.38 ± 0.05    | 0.50 ± 0.07 <sup>d</sup>    | 0.50 ± 0.08                 | 0.46 ± 0.11                 | 0.45 ± 0.07                 |
| Glc (mg/dL)                     | 50.10 ± 7.14   | 342.83 ± 37.30 <sup>c</sup> | 225.00 ± 99.82 <sup>e</sup> | 182.00 ± 81.43 <sup>f</sup> | 192.04 ± 75.31 <sup>f</sup> |
| Insulin (mg/dL)                 | 1.74 ± 0.46    | 1.76 ± 0.45                 | 1.70 ± 0.33                 | 1.77 ± 0.34                 | 2.05 ± 0.56                 |

<sup>a</sup> Values were represented as the mean ± SD (*n* = 10/group). Duration of the experiment = 6 weeks. The results were statistically assayed with Student's *t*-test. <sup>b</sup> TG, triglycerides; TC, total cholesterol; LDL, low-density lipoprotein; HDL, high-density lipoprotein; AST, aspartate aminotransferase; ALT, alanine transaminase; BUN, blood urea nitrogen; Cre, creatinine. <sup>c</sup> *p* < 0.01, <sup>d</sup> *p* < 0.05, compared with the negative control group. <sup>e</sup> *p* < 0.05, <sup>f</sup> *p* < 0.01, compared with the HFD/STZ group.

**Table 2.** Effect of LSE on the organ weight/bodyweight ratio of mice induced by an HFD combined with STZ treatment. <sup>a</sup>

| Groups<br>Organ Weight<br>(mg)/Body Weight (g)<br>Ratio | Control      | HFD/STZ                   | HFD/STZ + 1%<br>LSE | HFD/STZ + 2%<br>LSE       | HFD/STZ +<br>Metformin |
|---------------------------------------------------------|--------------|---------------------------|---------------------|---------------------------|------------------------|
| Pancreas                                                | 3.39 ± 1.15  | 1.39 ± 0.27 <sup>b</sup>  | 1.93 ± 0.56         | 2.54 ± 1.20 <sup>c</sup>  | 2.23 ± 1.27            |
| Liver                                                   | 46.32 ± 2.98 | 68.10 ± 5.56 <sup>b</sup> | 63.81 ± 5.31        | 58.12 ± 3.08 <sup>c</sup> | 61.25 ± 6.62           |
| Kidney                                                  | 18.77 ± 1.25 | 27.91 ± 1.67 <sup>b</sup> | 27.88 ± 1.06        | 27.43 ± 1.16              | 28.16 ± 2.08           |

<sup>a</sup> Values were represented as the mean ± SD (*n* = 10/group). Duration of the experiment = 6 weeks. The results were statistically assayed with Student's *t*-test. <sup>b</sup> *p* < 0.01, compared with the negative control group. <sup>c</sup> *p* < 0.05, compared with the HFD/STZ group.

**Table 3.** The protective effect(s) of LSE in comparison to the positive control, metformin, in mice induced by an HFD combined with STZ treatment.

| Treatments <sup>a</sup> | Diabetes Symptoms           |            | Cell Injury             |            | Apoptosis       |                             | Autophagy               |
|-------------------------|-----------------------------|------------|-------------------------|------------|-----------------|-----------------------------|-------------------------|
|                         | OGTT<br>peaked at<br>30 min | HOMA-IR    | Islet areas             | TBARS      | TUNEL+<br>areas | Active-casp<br>3 expression | LC3-II<br>expression    |
| LSE                     | 38.95% (↓) <sup>b</sup>     | 80.87% (↓) | 93.57% (↑) <sup>c</sup> | 92.00% (↓) | 80.15% (↓)      | 76.77% (↓)                  | 195.95% (↑)             |
| Metformin               | 15.91% (↓)                  | 70.18% (↓) | 46.53% (↑)              | 75.67% (↓) | 53.44% (↓)      | 49.68% (↓)                  | 12.33% (↑) <sup>d</sup> |

<sup>a</sup> In the mice after induction of diabetes, followed by treatment with LSE (2%) or metformin (300 mg/kg), serum biochemical parameters, histological alterations, apoptosis, and autophagy marker were analyzed, as described in Materials and Methods. Duration of the experiment = 6 weeks. <sup>b</sup> Values were represented as inhibition (↓) rate of OGTT peaked at 30 min; HOMA-IR, TBARS, TUNEL+ areas, and active-caspase 3 expressions were calculated in LSE or metformin group compared with the HFD/STZ group, respectively. <sup>c</sup> Values were represented as induction (↑) rate of islet areas, and the LC3-II expression was calculated in LSE or metformin group compared with the HFD/STZ group, respectively. <sup>d</sup> No significant effect on LC3-II expression was observed in the metformin group compared with the HFD/STZ group.
